# Supplementary material for: A new blue AIEgen based on tetraphenylethene with multiple potential applications in fluorine ion sensors, mechanochromism, and organic light-emitting diodes
Source: Royal Society of Chemistry journal article supplement (doi:10.1039/c7nj04742h), 2018-01-01
Supplement: c7nj04742h1.pdf [file c7nj04742h1.pdf]

## ***Electronic Supplementary Information (ESI)***

### **Materials and instruments.**

Tetrahydrofuran (THF) was distilled from sodium benzophenone ketyl under dry nitrogen immediately prior to use. All other chemicals and reagents were purchased from commercial sources and used as received without further purification. NMR spectra were obtained on a Bruker AV 500 spectrometer. High resolution mass spectra (HRMS) were recorded on a GCT premier CAB048 mass spectrometer operating in MALDI-TOF mode. X-ray diffraction intensity data were collected on D/max-III A detector diffractometer. Absorption correction was applied using the multi-scan method (SADABS). Structures were solved by direct methods (SHELXS97) and refined by full-matrix least squares on  $F^2$  (SHELXL97). UV-vis absorption spectra were measured on a SHIMADZU UV-2600 spectrophotometer. Fluorescence spectra were recorded on a Horiba Fluoromax-4 fluorescence spectrophotometer. Fluorescence quantum yields were measured using a Hamamatsu absolute PL quantum yield spectrometer C11347 Quantaaurus\_QY. Fluorescence lifetimes were determined with a Hamamatsu C11367-11 Quantaaurus-Tau time-resolved spectrometer and the spectra were fitted with double exponential function. TGA analysis was carried out on a TA TGA Q5000 and DSC analysis was performed on a DSC Q1000 under dry nitrogen at a heating rate of 10 °C min<sup>-1</sup>. The ground-state geometries were optimized using the density functional with B3LYP hybrid functional at the basis set level of 6-31G(d). All the calculations were performed using Gaussian 09 package. Cyclic voltamograms were measured on a CHI 610E A14297 in a solution of tetra-*n*-butylammonium hexafluorophosphate (Bu<sub>4</sub>NPF<sub>6</sub>) (0.1 M) in dichloromethane at a scan rate of 100 mV s<sup>-1</sup>.

### **Devices fabrication.**

Multilayer OLEDs were fabricated by the vacuum-deposition method. Organic layers were deposited by high-vacuum ( $5 \times 10^{-4}$  Pa) thermal evaporation onto a glass substrate pre-coated with an indium tin oxide (ITO) layer. All organic layers were deposited sequentially. Thermal deposition rates for the organic materials, LiF and Al were 0.5, 0.5 and  $1 \text{ \AA s}^{-1}$ , respectively. The active area of each device was  $12 \text{ mm}^2$ . The electroluminescence spectra were measured on a Hitachi MPF-4 spectrofluorometer. The current density-voltage characteristics of the OLEDs were recorded on a Keithley 2400 Source Meter. The current density-voltage-luminance curves characterizations were carried out with a 3645 DC power supply combined with a 1980A spot photometer and they were recorded simultaneously. All measurements were done at room temperature under ambient conditions.

#### Additional data.

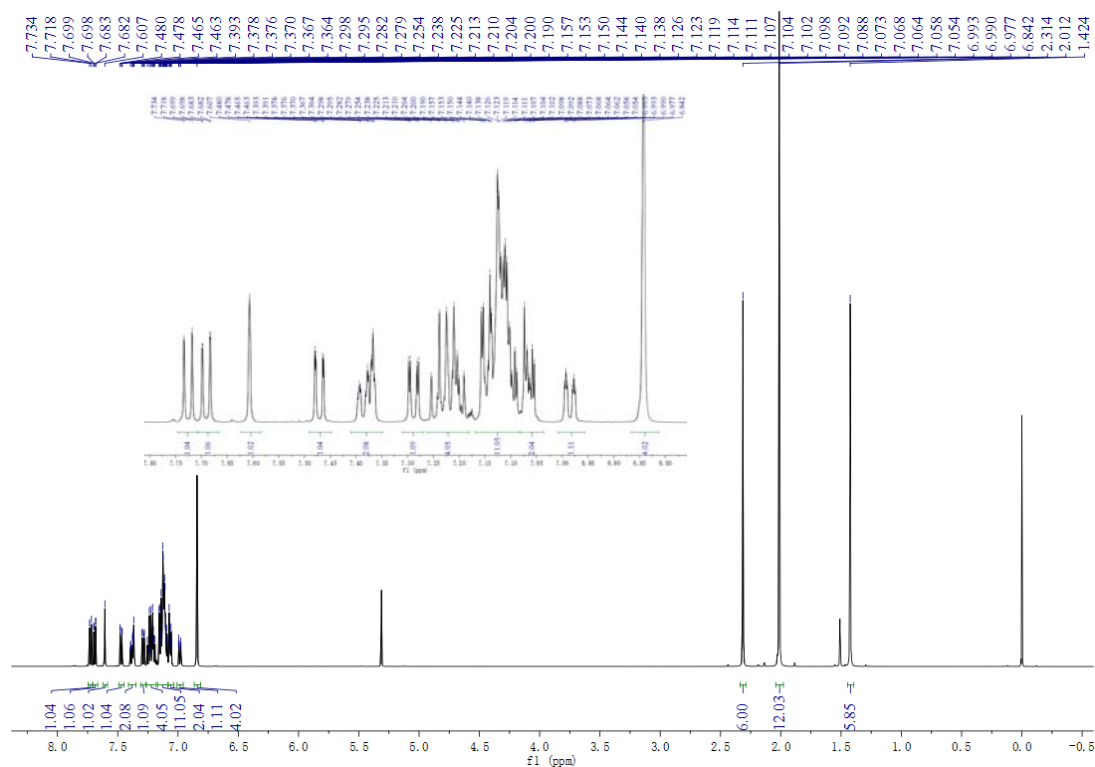

**Fig. S1**  $^1\text{H}$  NMR spectrum of TPE-FB in  $\text{CD}_2\text{Cl}_2$ .

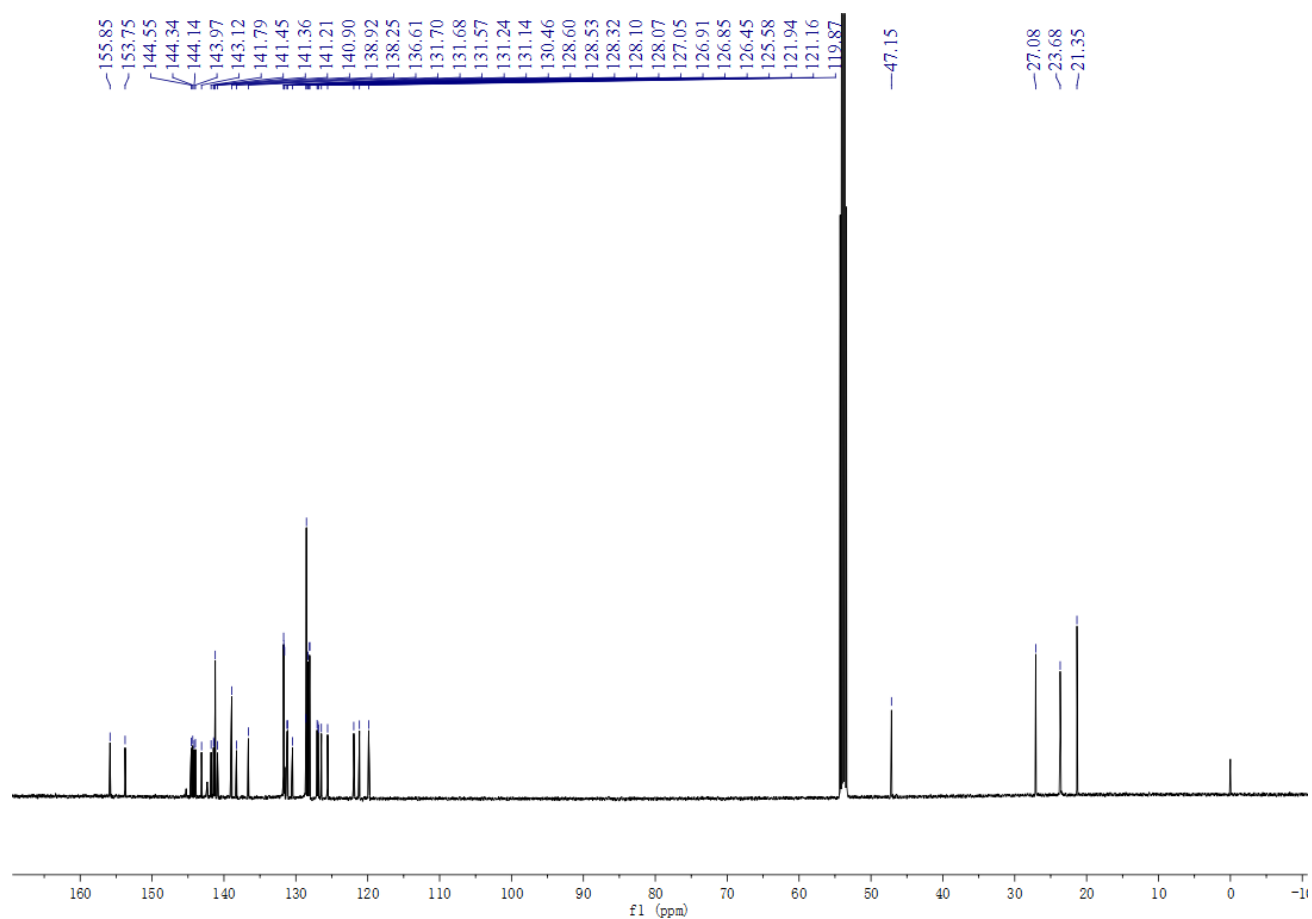

**Fig. S2**  $^{13}\text{C}$  NMR spectrum of TPE-FB in  $\text{CD}_2\text{Cl}_2$ .
